# Supplementary material
Source: MDPI journal article supplement (https://www.mdpi.com/2071-1050/11/16/4306)
Supplement: s1 [file s1]

## SUPPLEMENTARY MATERIALS

### Modernization of African Food Retailing and (Un)healthy Food Consumption

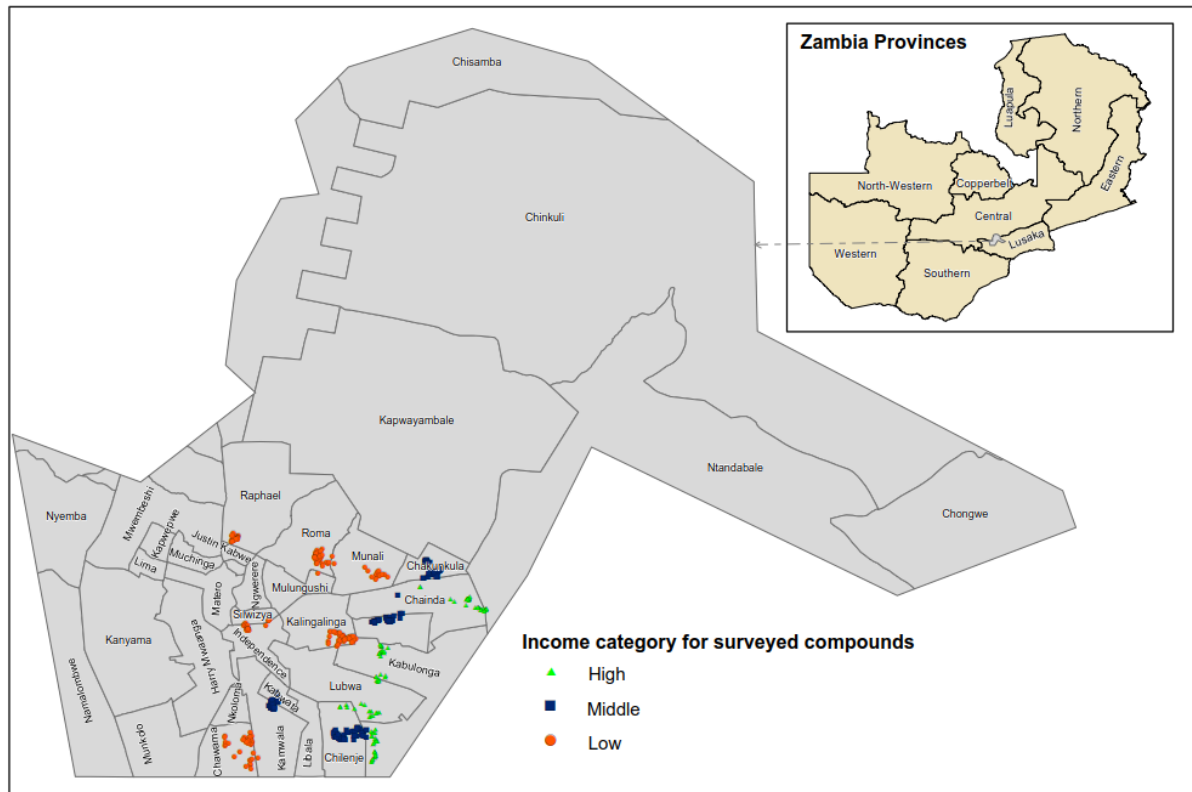

**Figure S1.** Map of Lusaka City with sampled compounds and households.

**Table S1.** List of main shopping malls with modern food retailers in Lusaka City.

| No. | Name of Shopping Mall | Location and Surrounding Compounds                   | Modern Food Retailers: Hypermarkets, Supermarkets (Fast-Food Restaurants in Parentheses) |
|-----|-----------------------|------------------------------------------------------|------------------------------------------------------------------------------------------|
| 1   | Arcades               | Roma, University of Zambia (UNZA)                    | Spurs                                                                                    |
| 2   | Cairo                 | Central Lusaka                                       | Shoprite (Food Fayre, Hungry Lion, Machachos)                                            |
| 3   | Chawama               | Chawama, John Haward, Kuku                           | Spur                                                                                     |
| 4   | Chazanga Shoprite     | Chazanga, SOS                                        | Shoprite                                                                                 |
| 5   | Chilenje Shoprite     | Chalala, Chilenje, Woodlands                         | Choppies, Shoprite (Debonairs Pizza, MM Chickens, Naaz)                                  |
| 6   | Choppies Complex      | Kabulonga, Sundel, Zamtel Flats                      | Choppies                                                                                 |
| 7   | Cosmopolitan          | Chawama, John Howard, Jon-Lengi, Makeni, Misisi      | Game Stores, Shoprite (Chicken Inn, Galito's, Hungry Lion, Mochachos, Pizza Hut)         |
| 8   | Cross Roads           | Cross Road, Kabulonga, Nyumba Yanga, Sundel          | Spurs (Gigibonta, Major Meat)                                                            |
| 9   | Down Town             | Chibolya, Jon-Lengi, Kabwata, Kamwala, Misisi        | Spurs (Big Bite, Debonairs Pizza, Down Town Foods)                                       |
| 10  | East Park             | Childley, Kalingalinga, Kalundu, Ng'ombe, Roma, UNZA | Food Lover's, PicknPay (Fishaways, Gigibonta, GoatChips, Hungry Lion, KEG, Pizza Hut)    |
| 11  | Embassy               | Chawama, Jon-Lengi, Makeni, Misisi                   | Embassy, Spurs (Papas, Piatto, Zorbas)                                                   |
| 12  | Garden City           | Avondole, Chelston                                   | Food Lover's, PicknPay (Bushman, Foodano)                                                |
| 13  | Kabulonga and Melissa | Kabulonga                                            | Melissa, PicknPay (Debonairs Pizza, KFC, Nando's, Subway)                                |

|    |                     |                                                                                                  |                                                                                                                                                |
|----|---------------------|--------------------------------------------------------------------------------------------------|------------------------------------------------------------------------------------------------------------------------------------------------|
| 14 | Levy Junction       | Central Lusaka, Chilulu, Evelyn Home College, Gardens, Nippa, North Mead, Roads Park, Thorn Park | Food Lover's, PicknPay (Chicken Inn, Hungry Lion, KFC, Pizza Inn, Wimpy)                                                                       |
| 15 | Makeni              | Chawama, Jon-Lengi, Makeni, Misisi                                                               | Food Lover's, PicknPay (Debonairs Pizza, KFC, Nando's)                                                                                         |
| 16 | Mama Betty Foxydale | Ngo'mbe, Roma                                                                                    | Spur (Debonairs Pizza, Gigibonta)                                                                                                              |
| 17 | Manda Hill          | Central Lusaka, Chilulu, Gardens, Longacres, Olympia, Roads Park                                 | Shoprite, Game Stores (Bread Café, Debonairs Pizza, Galito's, Hungry Lion, Mugg and Bean, My Asia, Nando's, Pizza Inn, Steers, Subway, Vasila) |
| 18 | Matero              | Matero                                                                                           | Shoprite (Hungry Lion)                                                                                                                         |
| 19 | Novara Great North  | Chazanga, SOS                                                                                    | PicknPay (GoatnChips, Hungry Lion)                                                                                                             |
| 20 | PHI                 | Kaunda Square, PHI, Mtendere                                                                     | PicknPay (Debonairs Pizza, King-Pie)                                                                                                           |
| 21 | SOS Spurs           | Chazanga, SOS                                                                                    | Spur                                                                                                                                           |
| 22 | Twin Palm           | Avondole, Chelston, Ibex, Salama Park                                                            | Shoprite (Chicken Inn, Debonairs Pizza, Hungry Lion)                                                                                           |
| 23 | Waterfalls          | Avondole, Chelston                                                                               | Shoprite (Gigibonta, Hungry Lion)                                                                                                              |
| 24 | Woodlands           | Chilenje, Kabulonga, Woodlands                                                                   | PicknPay (Creamy, Debonairs Pizza, Galito's, Nachies, O. Hagans, Pizza Inn)                                                                    |
| 25 | Zappa               | Chawama                                                                                          | (Debonairs Pizza)                                                                                                                              |

*Notes:* The main shopping malls that were operating in 2018 are included. Very small shopping malls are not included. Likewise, malls that were still under construction in 2018 are not included. The list was compiled by the authors based on internet search, personal visits, and key informant interviews.

**Table S2.** Food processing levels by food groups and items.

| Processing Level        | Food Group         | Food Items (Examples)                                                                                                                                                                                                 |
|-------------------------|--------------------|-----------------------------------------------------------------------------------------------------------------------------------------------------------------------------------------------------------------------|
| Unprocessed foods       | Cereals and tubers | Maize (dry/green), cassava, Irish potato, sweet potato, yams                                                                                                                                                          |
|                         | Eggs and milk      | Eggs, fresh whole milk                                                                                                                                                                                                |
|                         | Fruits             | Apples, avocado, banana (ripe/boiled), guava, mango, pawpaw, pineapple, pumpkin, orange/tangerine, sugar plum, watermelon                                                                                             |
|                         | Legumes            | Bean (fresh/dry), cowpea (fresh/dry), groundnut (fresh/dry), pigeonpea (fresh/dry), soybean, velvet bean                                                                                                              |
|                         | Vegetables         | Bean leaves, blackjack, cabbage, carrot, cassava leaves, cowpea leaves, cucumber, eggplant, garlic, greengram, lettuce, mushroom (cultivated/wild), okra, onion, pepper, pumpkin leaves, rape/mustard/chinese, tomato |
| Primary processed foods | Drinks and snacks  | Bottled/clear beer, bottled water, roasted cashew/macadamia nuts                                                                                                                                                      |
|                         | Meat and fish      | Beef, bush/game meat, chicken, duck, turkey, goat meat, sheep meat, pork, fish (fresh/frozen/dried)                                                                                                                   |
|                         | Cereals            | Rice, millet, oats, sorghum                                                                                                                                                                                           |
| Ultra-processed foods   | Bread and pasta    | Bread, buns, pasta, instant noodles                                                                                                                                                                                   |
|                         | Cereals and tubers | Maize flour, cornflakes, porridge mix, wheat flour, cassava flour                                                                                                                                                     |
|                         | Dairy products     | Cheese, milk, yoghurt                                                                                                                                                                                                 |
|                         | Oils and fats      | Butter/margarine, coconut oil, cooking oil/fat                                                                                                                                                                        |

|  |                                    |                                                                                                                                                                             |
|--|------------------------------------|-----------------------------------------------------------------------------------------------------------------------------------------------------------------------------|
|  | Meat and fish                      | Sausage (beef/chicken/pork), soya meat, canned meat and fish                                                                                                                |
|  | Miscellaneous                      | Canned foods, mandazi, mixed fruits/salads, pizza, samosa, ready-made foods/dishes                                                                                          |
|  | Sugar, sweetened drinks and snacks | Soft drinks, sweetened fruit juices, wine, jam, tomato sauce, salt, sugar, biscuits/cookies, cake, chips, chocolate, crisps, puffed salted corn chips, popcorn, salted nuts |

*Note:* The same classifications of foods were also used by [24].

**Table S3.** Additional descriptive statistics.

|                                       | Full Sample        | By Income Tercile  |                    |                    |
|---------------------------------------|--------------------|--------------------|--------------------|--------------------|
|                                       |                    | Lowest             | Middle             | Highest            |
| <i>Socioeconomic characteristics</i>  |                    |                    |                    |                    |
| Age of household head (years)         | 43.83<br>(12.86)   | 45.13<br>(13.67)   | 41.98<br>(12.68)   | 44.40<br>(12.02)   |
| Adolescent in household (dummy)       | 0.47<br>(0.50)     | 0.50<br>(0.50)     | 0.49<br>(0.50)     | 0.43<br>(0.50)     |
| Child in household (dummy)            | 0.59<br>(0.49)     | 0.71<br>(0.45)     | 0.53<br>(0.50)     | 0.54<br>(0.50)     |
| Bemba ethnicity (dummy)               | 0.29<br>(0.45)     | 0.28<br>(0.45)     | 0.24<br>(0.43)     | 0.36<br>(0.48)     |
| Tonga ethnicity (dummy)               | 0.19<br>(0.39)     | 0.15<br>(0.36)     | 0.21<br>(0.41)     | 0.21<br>(0.41)     |
| Protestant religion (dummy)           | 0.42<br>(0.49)     | 0.42<br>(0.49)     | 0.46<br>(0.50)     | 0.38<br>(0.49)     |
| Catholic religion (dummy)             | 0.26<br>(0.44)     | 0.31<br>(0.47)     | 0.19<br>(0.39)     | 0.29<br>(0.45)     |
| <i>Food expenditures</i>              |                    |                    |                    |                    |
| Cereals and tubers (ZMW/week)         | 106.41<br>(57.02)  | 87.37<br>(49.60)   | 108.25<br>(55.01)  | 123.94<br>(60.40)  |
| Legumes (ZMW/week)                    | 30.15<br>(43.99)   | 30.84<br>(43.52)   | 32.36<br>(49.17)   | 27.16<br>(38.63)   |
| Fruits (ZMW/week)                     | 7.88<br>(20.64)    | 7.23<br>(20.94)    | 6.75<br>(17.37)    | 9.70<br>(23.25)    |
| Vegetables (ZMW/week)                 | 59.63<br>(44.19)   | 57.99<br>(39.59)   | 64.98<br>(47.19)   | 55.82<br>(45.21)   |
| Meat and fish (ZMW/week)              | 172.84<br>(116.61) | 126.04<br>(100.16) | 178.54<br>(107.59) | 214.69<br>(124.26) |
| Dairy products and eggs (ZMW/week)    | 23.53<br>(33.24)   | 14.45<br>(18.70)   | 18.54<br>(25.32)   | 37.90<br>(45.25)   |
| Oils and fats (ZMW/week)              | 9.82<br>(9.47)     | 9.14<br>(8.65)     | 10.28<br>(9.09)    | 10.05<br>(10.61)   |
| Sugar, sweetened beverages (ZMW/week) | 33.86<br>(50.67)   | 27.55<br>(42.59)   | 32.23<br>(43.95)   | 41.96<br>(62.54)   |
| Observations                          | 475                | 159                | 160                | 156                |

*Notes:* Mean values are shown with standard deviations in parentheses. ZMW, Zambia Kwacha (local currency). The average exchange rate was ZMW 9.87 = US\$ 1 in mid-2018.

**Table S4.** Correlation matrix from multivariate probit model.

|                           | Modern Retailer    |                      |                   |                     | Traditional Retailer |                      |                   |       |
|---------------------------|--------------------|----------------------|-------------------|---------------------|----------------------|----------------------|-------------------|-------|
|                           | HM                 | SM                   | CS                | FF                  | GS                   | TM                   | RM                | NK    |
| Hypermarket (HM)          | 1.000              |                      |                   |                     |                      |                      |                   |       |
| Supermarket (SM)          | 0.161<br>(0.122)   | 1.000                |                   |                     |                      |                      |                   |       |
| Convenience store (CS)    | 0.252**<br>(0.114) | 0.149<br>(0.099)     | 1.000             |                     |                      |                      |                   |       |
| Fast-food restaurant (FF) | -0.088<br>(0.236)  | -0.047<br>(0.220)    | 0.198<br>(0.205)  | 1.000               |                      |                      |                   |       |
| Grocery store (GS)        | -0.098<br>(0.108)  | -0.304***<br>(0.073) | 0.009<br>(0.090)  | 0.388***<br>(0.122) | 1.000                |                      |                   |       |
| Traditional market (TM)   | 0.074<br>(0.108)   | -0.164*<br>(0.084)   | 0.064<br>(0.091)  | -0.046<br>(0.127)   | 0.022<br>(0.080)     | 1.000                |                   |       |
| Roadside market (RM)      | 0.060<br>(0.105)   | -0.040<br>(0.086)    | 0.163*<br>(0.091) | 0.285**<br>(0.124)  | 0.249***<br>(0.076)  | -0.282***<br>(0.081) | 1.000             |       |
| Neighborhood kiosk (NK)   | -0.003<br>(0.117)  | -0.145*<br>(0.086)   | -0.086<br>(0.096) | 0.137<br>(0.114)    | 0.222***<br>(0.081)  | -0.124<br>(0.086)    | -0.026<br>(0.083) | 1.000 |

*Notes:* Correlation coefficients are shown with standard errors in parentheses. The likelihood ratio test of zero correlation between the error terms is rejected at the 1% level;  $\chi^2$  (28) = 85. \* significant at the 10% level; \*\* significant at the 5% level; \*\*\* significant at the 1% level.

**Table S5.** Associations between the use of retailers and food processing levels (full results).

|                       | Only Supermarkets Considered |                         |                   | Multiple Food Retailers Considered |                         |                   |
|-----------------------|------------------------------|-------------------------|-------------------|------------------------------------|-------------------------|-------------------|
|                       | Ultra-Processed Foods        | Primary Processed Foods | Unprocessed Foods | Ultra-Processed Foods              | Primary Processed Foods | Unprocessed Foods |
|                       | (1)                          | (2)                     | (3)               | (1)                                | (2)                     | (3)               |
| Hypermarket           |                              |                         |                   | 0.146*                             | −0.018                  | −0.128            |
|                       |                              |                         |                   | (0.071)                            | (0.095)                 | (0.091)           |
| Supermarket           | 0.051**                      | 0.043*                  | −0.094***         | 0.196***                           | −0.053                  | −0.143*           |
|                       | (0.022)                      | (0.021)                 | (0.027)           | (0.052)                            | (0.075)                 | (0.075)           |
| Convenience store     |                              |                         |                   | 0.293***                           | −0.267**                | −0.026            |
|                       |                              |                         |                   | (0.091)                            | (0.110)                 | (0.097)           |
| Fast-food restaurant  |                              |                         |                   | 0.611***                           | −0.671***               | 0.060             |
|                       |                              |                         |                   | (0.109)                            | (0.091)                 | (0.168)           |
| Grocery store         |                              |                         |                   | 0.217***                           | −0.043                  | −0.174**          |
|                       |                              |                         |                   | (0.055)                            | (0.070)                 | (0.066)           |
| Traditional market    |                              |                         |                   | 0.063                              | −0.122*                 | 0.058             |
|                       |                              |                         |                   | (0.044)                            | (0.063)                 | (0.070)           |
| Roadside market       |                              |                         |                   | 0.041                              | −0.164**                | 0.122*            |
|                       |                              |                         |                   | (0.054)                            | (0.061)                 | (0.063)           |
| Neighborhood kiosk    |                              |                         |                   | 0.274***                           | −0.101                  | −0.173*           |
|                       |                              |                         |                   | (0.079)                            | (0.093)                 | (0.098)           |
| Male                  | −0.174                       | −0.374                  | 0.548             | −0.648                             | −0.313                  | 0.961             |
|                       | (1.404)                      | (1.996)                 | (1.911)           | (1.221)                            | (1.939)                 | (1.646)           |
| Age                   | 0.001                        | −0.057                  | 0.056             | 0.015                              | −0.071                  | 0.056*            |
|                       | (0.050)                      | (0.039)                 | (0.050)           | (0.039)                            | (0.043)                 | (0.027)           |
| Household size        | 0.707*                       | −1.254***               | 0.547             | 0.875**                            | −1.063**                | 0.188             |
|                       | (0.363)                      | (0.404)                 | (0.445)           | (0.333)                            | (0.433)                 | (0.304)           |
| Education             | −0.550***                    | 0.700***                | −0.150            | −0.601***                          | 0.673***                | −0.072            |
|                       | (0.122)                      | (0.214)                 | (0.168)           | (0.126)                            | (0.198)                 | (0.182)           |
| Income (log)          | 0.159                        | 1.389*                  | −1.548**          | −0.440                             | 1.297*                  | −0.857            |
|                       | (0.423)                      | (0.714)                 | (0.621)           | (0.458)                            | (0.712)                 | (0.599)           |
| Chewa                 | 0.089                        | 2.757                   | −2.846            | −0.241                             | 2.327                   | −2.086            |
|                       | (1.643)                      | (2.022)                 | (2.565)           | (1.589)                            | (2.188)                 | (2.212)           |
| Tonga                 | 0.544                        | 1.406                   | −1.950            | −0.001                             | 1.319                   | −1.318            |
|                       | (1.608)                      | (2.057)                 | (1.553)           | (1.698)                            | (2.208)                 | (1.581)           |
| Catholic              | −0.977                       | −0.171                  | 1.148             | −1.150                             | −0.697                  | 1.847**           |
|                       | (2.111)                      | (1.847)                 | (0.963)           | (2.064)                            | (1.968)                 | (0.713)           |
| Seventh Day Adventist | −2.916                       | 0.252                   | 2.664*            | −2.075                             | 0.570                   | 1.505             |
|                       | (1.719)                      | (1.770)                 | (1.441)           | (1.566)                            | (1.985)                 | (1.413)           |
| Constant              | 35.601***                    | 22.579***               | 41.820***         | 29.124***                          | 33.773***               | 37.103***         |
|                       | (5.417)                      | (5.688)                 | (5.499)           | (7.932)                            | (8.944)                 | (9.491)           |
| R-squared             | 0.035                        | 0.122                   | 0.146             | 0.116                              | 0.149                   | 0.256             |
| Observations          | 475                          | 475                     | 475               | 475                                | 475                     | 475               |

*Notes:* Ordinary least squares estimates are shown with robust standard errors clustered at *compound* level in parentheses. All types of retailers are represented by the household expenditure share for this retailer. Bemba and Protestant are used as a reference group for ethnicity—Chewa and Tonga, and religion status—Catholic and Seventh Day Adventist, respectively. \* significant at the 10% level; \*\* significant at the 5% level; \*\*\* significant at the 1% level.

**Table S6.** Associations between supermarket use and food processing levels (seemingly unrelated regressions).

|                       | Ultra-Processed Foods<br>(Expenditure Share) | Primary Processed Foods<br>(Expenditure Share) | Unprocessed Foods<br>(Expenditure Share) |
|-----------------------|----------------------------------------------|------------------------------------------------|------------------------------------------|
| Supermarket           | 0.051**<br>(0.023)                           | 0.043<br>(0.028)                               | -0.094***<br>(0.023)                     |
| Male                  | -0.174<br>(1.318)                            | -0.374<br>(1.593)                              | 0.548<br>(1.299)                         |
| Age                   | 0.001<br>(0.051)                             | -0.057<br>(0.061)                              | 0.056<br>(0.050)                         |
| Household size        | 0.707*<br>(0.412)                            | -1.254**<br>(0.497)                            | 0.547<br>(0.406)                         |
| Education             | -0.550**<br>(0.219)                          | 0.700***<br>(0.264)                            | -0.150<br>(0.216)                        |
| Income (log)          | 0.159<br>(0.645)                             | 1.389*<br>(0.780)                              | -1.548**<br>(0.636)                      |
| Chewa                 | 0.089<br>(1.932)                             | 2.757<br>(2.335)                               | -2.846<br>(1.905)                        |
| Tonga                 | 0.544<br>(1.756)                             | 1.406<br>(2.122)                               | -1.950<br>(1.731)                        |
| Catholic              | -0.977<br>(1.474)                            | -0.171<br>(1.781)                              | 1.148<br>(1.453)                         |
| Seventh Day Adventist | -2.916<br>(1.865)                            | 0.252<br>(2.254)                               | 2.664<br>(1.839)                         |
| Constant              | 35.601***<br>(6.492)                         | 22.579***<br>(7.845)                           | 41.820***<br>(6.401)                     |
| Observations          | 475                                          | 475                                            | 475                                      |

*Notes:* Seemingly unrelated regression estimates are shown with standard errors in parentheses. Supermarkets are represented by the household expenditure share for this retailer. \* significant at the 10% level; \*\* significant at the 5% level; \*\*\* significant at the 1% level.

**Table S7.** Associations between the use of different retailers and food processing levels (absolute expenditures).

|                                                    | Ultra-Processed Foods<br>(Expenditures, log) | Primary Processed Foods<br>(Expenditures, log) | Unprocessed Foods<br>(Expenditures, log) |
|----------------------------------------------------|----------------------------------------------|------------------------------------------------|------------------------------------------|
| <i>Panel A: Supermarkets only</i>                  |                                              |                                                |                                          |
| Supermarket                                        | 0.002<br>(0.001)                             | 0.002<br>(0.001)                               | -0.004*<br>(0.002)                       |
| Other covariates                                   | Yes                                          | Yes                                            | Yes                                      |
| <i>Panel B: Multiple food retailers considered</i> |                                              |                                                |                                          |
| Hypermarket                                        | 0.012***<br>(0.004)                          | 0.007*<br>(0.004)                              | 0.006<br>(0.006)                         |
| Supermarket                                        | 0.009**<br>(0.003)                           | 0.003<br>(0.003)                               | 0.0005<br>(0.006)                        |
| Convenience store                                  | 0.014***<br>(0.005)                          | -0.003<br>(0.003)                              | 0.009<br>(0.006)                         |
| Fast-food restaurant                               | 0.041***<br>(0.006)                          | 0.0005<br>(0.012)                              | 0.029***<br>(0.006)                      |
| Grocery store                                      | 0.009**<br>(0.003)                           | 0.001<br>(0.003)                               | -0.002<br>(0.006)                        |
| Traditional market                                 | 0.006*<br>(0.003)                            | 0.002<br>(0.003)                               | 0.011**<br>(0.005)                       |
| Roadside market                                    | 0.003                                        | -0.002                                         | 0.010**                                  |

|                    |         |         |         |
|--------------------|---------|---------|---------|
|                    | (0.003) | (0.003) | (0.004) |
| Neighborhood kiosk | 0.010** | 0.0002  | −0.004  |
|                    | (0.004) | (0.003) | (0.006) |
| Other covariates   | Yes     | Yes     | Yes     |
| Observations       | 475     | 469     | 471     |

*Notes:* Ordinary least squares estimates are shown with robust standard errors clustered at *compound* level in parentheses. All types of retailers are represented by the household expenditure share for this retailer. The same socioeconomic control variables are included as in Table S5. \* significant at the 10% level; \*\* significant at the 5% level; \*\*\* significant at the 1% level.

**Table S8.** Associations between the use of different retailers and food processing levels (by poverty status).

|                                                    | Poor Households                    |                                | Non-Poor Households                |                                |
|----------------------------------------------------|------------------------------------|--------------------------------|------------------------------------|--------------------------------|
|                                                    | Ultra-processed<br>(Exp. Share, %) | Unprocessed<br>(Exp. Share, %) | Ultra-Processed<br>(Exp. share, %) | Unprocessed<br>(Exp. Share, %) |
| <i>Panel A: Only supermarkets considered</i>       |                                    |                                |                                    |                                |
| Supermarket only                                   | 0.031<br>(0.050)                   | −0.058<br>(0.087)              | 0.057**<br>(0.026)                 | −0.111***<br>(0.025)           |
| Other covariates                                   | Yes                                | Yes                            | Yes                                | Yes                            |
| <i>Panel B: Multiple food retailers considered</i> |                                    |                                |                                    |                                |
| Hypermarket                                        |                                    |                                | 0.165**<br>(0.060)                 | −0.118<br>(0.087)              |
| Supermarket                                        | 0.035<br>(0.128)                   | −0.165<br>(0.205)              | 0.231***<br>(0.047)                | −0.144<br>(0.095)              |
| Convenience store                                  | 0.274*<br>(0.130)                  | 0.114<br>(0.187)               | 0.329**<br>(0.111)                 | −0.076<br>(0.125)              |
| Fast-food restaurant                               | −0.627<br>(0.853)                  | −1.055<br>(1.003)              | 0.679***<br>(0.081)                | 0.071<br>(0.219)               |
| Grocery store                                      | 0.009<br>(0.118)                   | −0.165<br>(0.163)              | 0.269***<br>(0.052)                | −0.225*<br>(0.106)             |
| Traditional market                                 | −0.029<br>(0.098)                  | −0.022<br>(0.151)              | 0.064<br>(0.048)                   | 0.106<br>(0.084)               |
| Roadside market                                    | −0.073<br>(0.075)                  | 0.020<br>(0.147)               | 0.056<br>(0.067)                   | 0.158*<br>(0.084)              |
| Neighborhood kiosk                                 | 0.040<br>(0.147)                   | −0.375**<br>(0.165)            | 0.358***<br>(0.053)                | −0.067<br>(0.123)              |
| Other covariates                                   | Yes                                | Yes                            | Yes                                | Yes                            |
| Observations                                       | 126                                | 126                            | 349                                | 349                            |

*Notes:* Ordinary least squares estimates are shown with robust standard errors clustered at *compound* level in parentheses. Poor households are those with less than US\$1.90 per capita and day in purchasing power parity terms [36]. All types of retailers are represented by the household expenditure share for this retailer. For poor households, hypermarkets were dropped due to perfect collinearity. The same socioeconomic control variables are included as in Table S5. \* significant at the 10% level; \*\* significant at the 5% level; \*\*\* significant at the 1% level.

**Table S9.** Associations between the use of different retailers and the consumption of selected food groups (full results, supermarkets only).

|                          | Household Food Consumption (kg/week) |                     |                     |                     |                     |                       |                      |                     |                      |
|--------------------------|--------------------------------------|---------------------|---------------------|---------------------|---------------------|-----------------------|----------------------|---------------------|----------------------|
|                          | Cereals<br>and Tubers                | Legumes             | Fruits              | Vegetables          | Meat and<br>Fish    | Dairy<br>Products     | Eggs                 | Oils and<br>Fats    | Sugar,<br>Beverages  |
| Supermarket              | −0.003<br>(0.006)                    | −0.001<br>(0.005)   | −0.005<br>(0.004)   | −0.001<br>(0.009)   | 0.015***<br>(0.006) | 0.014*<br>(0.007)     | −0.002<br>(0.001)    | −0.003<br>(0.002)   | −0.010***<br>(0.004) |
| Male                     | 0.281<br>(0.471)                     | 0.646***<br>(0.160) | −0.031<br>(0.338)   | 0.627<br>(0.483)    | 0.361<br>(0.245)    | −0.072<br>(0.552)     | 0.122<br>(0.083)     | 0.397***<br>(0.085) | 0.150<br>(0.167)     |
| Age                      | 0.026<br>(0.021)                     | 0.006<br>(0.007)    | 0.006<br>(0.012)    | −0.007<br>(0.014)   | −0.003<br>(0.008)   | 0.011<br>(0.019)      | 0.002<br>(0.004)     | 0.008***<br>(0.003) | 0.019***<br>(0.006)  |
| Household size           | 0.907***<br>(0.137)                  | 0.233***<br>(0.078) | −0.074<br>(0.072)   | 0.384***<br>(0.112) | 0.145**<br>(0.072)  | 0.278<br>(0.211)      | −0.017<br>(0.020)    | 0.052*<br>(0.029)   | 0.121<br>(0.098)     |
| Education                | 0.042<br>(0.048)                     | 0.032<br>(0.031)    | 0.067*<br>(0.037)   | −0.038<br>(0.065)   | 0.150***<br>(0.043) | 0.121<br>(0.097)      | 0.050**<br>(0.020)   | −0.017*<br>(0.010)  | 0.103***<br>(0.022)  |
| Income (log)             | 0.441**<br>(0.203)                   | −0.203<br>(0.139)   | 0.142<br>(0.133)    | −0.205<br>(0.210)   | 0.445**<br>(0.174)  | 0.844***<br>(0.286)   | 0.121***<br>(0.044)  | 0.083**<br>(0.038)  | 0.217<br>(0.134)     |
| Chewa                    | 0.933*<br>(0.555)                    | 0.589<br>(0.361)    | 0.128<br>(0.328)    | −0.422<br>(0.719)   | 0.790**<br>(0.309)  | −0.619<br>(0.707)     | 0.065<br>(0.126)     | 0.468***<br>(0.098) | 0.517<br>(0.360)     |
| Tonga                    | 0.269<br>(0.518)                     | 0.438**<br>(0.197)  | −0.402<br>(0.296)   | 1.042**<br>(0.497)  | 0.581*<br>(0.327)   | 0.344<br>(0.513)      | 0.037<br>(0.159)     | 0.249***<br>(0.067) | −0.095<br>(0.219)    |
| Catholic                 | 0.107<br>(0.386)                     | 0.172<br>(0.252)    | 0.309<br>(0.305)    | 0.545<br>(0.554)    | −0.327<br>(0.345)   | −0.288<br>(0.344)     | 0.121<br>(0.087)     | −0.030<br>(0.086)   | 0.007<br>(0.205)     |
| Seventh Day<br>Adventist | 0.964**<br>(0.393)                   | 0.367<br>(0.272)    | 0.632***<br>(0.232) | 0.704<br>(0.588)    | −0.465<br>(0.444)   | 0.363<br>(0.512)      | −0.114<br>(0.132)    | 0.165**<br>(0.077)  | −0.295<br>(0.218)    |
| Constant                 | −0.035<br>(2.355)                    | 0.813<br>(1.145)    | −3.536*<br>(2.017)  | 4.512**<br>(2.238)  | −3.650**<br>(1.496) | −15.110***<br>(4.112) | −1.964***<br>(0.558) | −1.043**<br>(0.428) | −3.487**<br>(1.494)  |
| Pseudo-R-squared         | 0.060                                | 0.027               | 0.014               | 0.011               | 0.073               | 0.081                 | 0.053                | 0.068               | 0.024                |
| Observations             | 475                                  | 475                 | 475                 | 475                 | 475                 | 475                   | 475                  | 475                 | 475                  |

Notes: Tobit estimates are shown with robust standard errors clustered at *compound* level in parentheses. All types of retailers are represented by the household expenditure share for this retailer. \* significant at the 10% level; \*\* significant at the 5% level; \*\*\* significant at the 1% level.



**Table S10.** Associations between the use of different retailers and the consumption of selected food groups (full results, all retailers).

|                       | Household Food Consumption (kg/week) |                     |                     |                     |                     |                       |                      |                      |                      |
|-----------------------|--------------------------------------|---------------------|---------------------|---------------------|---------------------|-----------------------|----------------------|----------------------|----------------------|
|                       | Cereals and<br>Tubers                | Legumes             | Fruits              | Vegetables          | Meat and<br>Fish    | Dairy<br>Products     | Eggs                 | Oils and<br>Fats     | Sugar,<br>Beverages  |
| Hypermarket           | 0.025<br>(0.031)                     | -0.009<br>(0.019)   | -0.009<br>(0.018)   | 0.013<br>(0.020)    | 0.043*<br>(0.023)   | 0.053*<br>(0.029)     | 0.007<br>(0.006)     | 0.009<br>(0.005)     | 0.040***<br>(0.008)  |
| Supermarket           | 0.011<br>(0.018)                     | 0.003<br>(0.012)    | -0.031**<br>(0.015) | 0.027<br>(0.021)    | 0.030*<br>(0.016)   | 0.055***<br>(0.020)   | 0.005<br>(0.003)     | 0.005<br>(0.004)     | 0.015*<br>(0.008)    |
| Convenience store     | 0.058**<br>(0.025)                   | -0.007<br>(0.011)   | -0.039*<br>(0.023)  | 0.012<br>(0.019)    | 0.022<br>(0.015)    | 0.014<br>(0.050)      | 0.002<br>(0.005)     | 0.014**<br>(0.006)   | 0.020<br>(0.013)     |
| Fast-food restaurant  | -0.100***<br>(0.037)                 |                     |                     |                     | 0.110*<br>(0.062)   | 0.132**<br>(0.055)    |                      |                      | 0.105**<br>(0.049)   |
| Grocery store         | 0.013<br>(0.016)                     | -0.003<br>(0.013)   | -0.030*<br>(0.017)  | 0.016<br>(0.023)    | 0.026<br>(0.016)    | 0.063**<br>(0.029)    | 0.008**<br>(0.004)   | 0.005<br>(0.004)     | 0.028***<br>(0.007)  |
| Traditional market    | 0.011<br>(0.018)                     | 0.016<br>(0.013)    | -0.033**<br>(0.015) | 0.058***<br>(0.015) | 0.015<br>(0.015)    | 0.023<br>(0.022)      | 0.004<br>(0.003)     | 0.011***<br>(0.004)  | 0.024***<br>(0.008)  |
| Roadside market       | 0.010<br>(0.019)                     | 0.012<br>(0.013)    | -0.038**<br>(0.018) | 0.038**<br>(0.016)  | 0.007<br>(0.016)    | 0.038**<br>(0.015)    | 0.006<br>(0.004)     | 0.005<br>(0.004)     | 0.010<br>(0.007)     |
| Neighborhood kiosk    | 0.030<br>(0.027)                     | -0.013<br>(0.015)   | -0.014<br>(0.017)   | -0.008<br>(0.025)   | -0.010<br>(0.019)   | 0.057**<br>(0.027)    | 0.017***<br>(0.004)  | 0.007<br>(0.005)     | 0.027*<br>(0.015)    |
| Male                  | 0.217<br>(0.478)                     | 0.687***<br>(0.141) | -0.020<br>(0.308)   | 0.765<br>(0.469)    | 0.471*<br>(0.249)   | -0.148<br>(0.531)     | 0.053<br>(0.085)     | 0.421***<br>(0.092)  | 0.173<br>(0.193)     |
| Age                   | 0.025<br>(0.021)                     | 0.007<br>(0.008)    | -0.002<br>(0.011)   | -0.003<br>(0.014)   | -0.0003<br>(0.007)  | 0.015<br>(0.018)      | 0.003<br>(0.004)     | 0.009***<br>(0.003)  | 0.021***<br>(0.006)  |
| Household size        | 0.955***<br>(0.123)                  | 0.208***<br>(0.073) | -0.034<br>(0.072)   | 0.342***<br>(0.088) | 0.128*<br>(0.076)   | 0.281<br>(0.208)      | -0.004<br>(0.020)    | 0.056**<br>(0.028)   | 0.139<br>(0.101)     |
| Education             | 0.049<br>(0.049)                     | 0.034<br>(0.032)    | 0.064*<br>(0.036)   | -0.045<br>(0.065)   | 0.121***<br>(0.035) | 0.118<br>(0.099)      | 0.057***<br>(0.020)  | -0.022*<br>(0.012)   | 0.086***<br>(0.023)  |
| Income (log)          | 0.374*<br>(0.193)                    | -0.098<br>(0.127)   | 0.016<br>(0.114)    | 0.032<br>(0.197)    | 0.462***<br>(0.171) | 0.864***<br>(0.263)   | 0.106**<br>(0.043)   | 0.089*<br>(0.047)    | 0.195<br>(0.148)     |
| Chewa                 | 0.953*<br>(0.537)                    | 0.646**<br>(0.301)  | 0.086<br>(0.389)    | -0.287<br>(0.718)   | 0.725**<br>(0.292)  | -0.750<br>(0.728)     | 0.078<br>(0.109)     | 0.500***<br>(0.103)  | 0.546<br>(0.332)     |
| Tonga                 | 0.290<br>(0.526)                     | 0.473**<br>(0.204)  | -0.409<br>(0.282)   | 1.040**<br>(0.426)  | 0.429<br>(0.310)    | 0.312<br>(0.505)      | 0.045<br>(0.149)     | 0.234***<br>(0.073)  | -0.207<br>(0.218)    |
| Catholic              | 0.100<br>(0.424)                     | 0.265<br>(0.242)    | 0.239<br>(0.304)    | 0.764<br>(0.466)    | -0.297<br>(0.340)   | -0.275<br>(0.335)     | 0.121<br>(0.094)     | -0.003<br>(0.084)    | 0.039<br>(0.167)     |
| Seventh Day Adventist | 1.025***<br>(0.384)                  | 0.224<br>(0.265)    | 0.720***<br>(0.219) | 0.366<br>(0.574)    | -0.462<br>(0.434)   | 0.452<br>(0.510)      | -0.078<br>(0.119)    | 0.129*<br>(0.071)    | -0.312<br>(0.211)    |
| Constant              | -0.852<br>(3.222)                    | -0.848<br>(1.862)   | 0.741<br>(1.744)    | -1.149<br>(2.243)   | -5.015*<br>(2.774)  | -19.214***<br>(5.136) | -2.542***<br>(0.711) | -1.830***<br>(0.563) | -5.442***<br>(1.490) |
| Pseudo-R-squared      | 0.065                                | 0.045               | 0.044               | 0.028               | 0.086               | 0.101                 | 0.074                | 0.085                | 0.034                |
| Observations          | 475                                  | 475                 | 475                 | 475                 | 475                 | 475                   | 475                  | 475                  | 475                  |

*Notes:* Tobit estimates are shown with robust standard errors clustered at *compound* level in parentheses. All types of retailers are represented by the household expenditure share for this retailer. \* significant at the 10% level; \*\* significant at the 5% level; \*\*\* significant at the 1% level.

**Table S11.** Associations between the use of different retailers and the consumption of food groups (in value terms).

|                                               | Food Expenditure (ZMW/week) |                    |                      |                      |                     |                     |                     |                   |
|-----------------------------------------------|-----------------------------|--------------------|----------------------|----------------------|---------------------|---------------------|---------------------|-------------------|
|                                               | Cereals and Tubers          | Legumes            | Fruits               | Vegetables           | Meat and Fish       | Dairy and Eggs      | Oils and Fats       | Sugar, Beverages  |
| <i>Panel A: Only supermarkets considered</i>  |                             |                    |                      |                      |                     |                     |                     |                   |
| Supermarket                                   | 0.095<br>(0.069)            | −0.015<br>(0.134)  | −0.315**<br>(0.140)  | −0.258***<br>(0.081) | 0.445***<br>(0.167) | −0.059<br>(0.053)   | −0.017<br>(0.032)   | −0.086<br>(0.054) |
| Other covariates                              | Yes                         | Yes                | Yes                  | Yes                  | Yes                 | Yes                 | Yes                 | Yes               |
| <i>Panel B: Multiple retailers considered</i> |                             |                    |                      |                      |                     |                     |                     |                   |
| Hypermarket                                   | 0.863**<br>(0.358)          | 0.025<br>(0.422)   | 0.248<br>(0.813)     | −0.300<br>(0.267)    | 1.115*<br>(0.664)   | 0.895**<br>(0.366)  | 0.237***<br>(0.066) | 0.109<br>(0.133)  |
| Supermarket                                   | 0.233<br>(0.177)            | 0.197<br>(0.258)   | −0.866***<br>(0.330) | −0.066<br>(0.244)    | 1.093***<br>(0.381) | 0.284*<br>(0.152)   | 0.159**<br>(0.069)  | −0.011<br>(0.149) |
| Convenience store                             | 0.952**<br>(0.409)          | 0.521*<br>(0.284)  | −1.084*<br>(0.564)   | 0.446<br>(0.410)     | 0.436<br>(0.356)    | 0.384**<br>(0.173)  | 0.255***<br>(0.077) | 0.024<br>(0.220)  |
| Fast-food restaurant                          | 0.866<br>(1.317)            |                    |                      |                      | 4.527**<br>(1.789)  | 1.518<br>(1.231)    |                     | 0.355<br>(0.369)  |
| Grocery store                                 | 0.189<br>(0.180)            | −0.035<br>(0.242)  | −0.740**<br>(0.342)  | −0.021<br>(0.268)    | 0.879**<br>(0.400)  | 0.348*<br>(0.209)   | 0.140**<br>(0.065)  | 0.074<br>(0.123)  |
| Traditional market                            | 0.008<br>(0.141)            | 0.546**<br>(0.254) | −0.711**<br>(0.294)  | 0.418**<br>(0.196)   | 0.722*<br>(0.379)   | 0.203<br>(0.150)    | 0.220***<br>(0.062) | 0.054<br>(0.130)  |
| Roadside market                               | −0.143<br>(0.168)           | 0.417*<br>(0.225)  | −0.878***<br>(0.301) | 0.593***<br>(0.173)  | 0.508<br>(0.383)    | 0.329**<br>(0.164)  | 0.110*<br>(0.063)   | −0.111<br>(0.129) |
| Neighborhood kiosk                            | 0.229<br>(0.221)            | −0.239<br>(0.279)  | −0.108<br>(0.445)    | 0.017<br>(0.310)     | 0.146<br>(0.477)    | 0.670***<br>(0.177) | 0.219**<br>(0.091)  | 0.282<br>(0.262)  |
| Other covariates                              | Yes                         | Yes                | Yes                  | Yes                  | Yes                 | Yes                 | Yes                 | Yes               |
| Observations                                  | 475                         | 475                | 475                  | 475                  | 475                 | 475                 | 475                 | 475               |

*Notes:* Tobit estimates are shown with robust standard errors clustered at *compound* level in parentheses. All types of retailers are represented by the household expenditure share for this retailer. Socioeconomic control variables are included in all models, but are not shown here for brevity. \* significant at the 10% level; \*\* significant at the 5% level; \*\*\* significant at the 1% level.
